# Supplementary material
Source: PubMed Central journal article supplement (PMC4759659)
Supplement: NIHMS743027-supplement-1.pdf [file NIHMS743027-supplement-1.pdf]

### Appendix 1. Diagnoses Used in Frailty Algorithm

| Cluster | Description                                            | Cluster Description                   |
|---------|--------------------------------------------------------|---------------------------------------|
| 1       | Nutritional Marasmus                                   | Malnutrition and/or Catabolic Illness |
| 1       | Other severe protein-calorie malnutrition              | Malnutrition and/or Catabolic Illness |
| 2       | Presenile Dementia                                     | Dementia                              |
| 2       | Presenile dementia, uncomplicated                      | Dementia                              |
| 2       | Presenile dementia with delirium                       | Dementia                              |
| 2       | Presenile dementia with delusional features            | Dementia                              |
| 2       | Presenile dementia with depressive features            | Dementia                              |
| 2       | Senile dementia with delusional or depressive features | Dementia                              |
| 2       | Senile dementia with delusional features               | Dementia                              |
| 2       | Senile dementia with depressive features               | Dementia                              |
| 2       | Senile dementia with delirium                          | Dementia                              |
| 2       | Vascular dementia                                      | Dementia                              |
| 2       | Vascular dementia with delirium                        | Dementia                              |
| 2       | Vascular dementia with delusional features             | Dementia                              |
| 2       | Vascular dementia with depressive features             | Dementia                              |
| 2       | Dementia in conditions classified elsewhere            | Dementia                              |
| 2       | Dementia Unspecified                                   | Dementia                              |
| 2       | Dementia, Unspecified, Without Behavioral Disturbance  | Dementia                              |
| 2       | Dementia, Unspecified, With Behavioral Disturbance     | Dementia                              |
| 2       | Alzheimer's Disease                                    | Dementia                              |
| 2       | Frontotemporal dementia                                | Dementia                              |
| 2       | Pick's disease                                         | Dementia                              |
| 2       | Other frontotemporal dementia                          | Dementia                              |
| 2       | Dementia with lewy bodies                              | Dementia                              |
| 3       | Profound impairment, both eyes                         | Severe Vision Impairment              |

|   |                                                                            |                          |
|---|----------------------------------------------------------------------------|--------------------------|
| 3 | Profound impairment, both eyes, not further specified                      | Severe Vision Impairment |
| 3 | Total impairment, both eyes                                                | Severe Vision Impairment |
| 3 | Better eye: near total impairment; lesser eye: total impairment            | Severe Vision Impairment |
| 3 | Near-total impairment, better eye- lesser eye: total impairment            | Severe Vision Impairment |
| 3 | Near-total impairment, both eyes                                           | Severe Vision Impairment |
| 3 | Better eye: profound impairment; lesser eye: not further specified         | Severe Vision Impairment |
| 3 | Profound impairment, better eye- lesser eye: total impairment              | Severe Vision Impairment |
| 3 | Profound impairment, better eye- lesser eye near-total impairment          | Severe Vision Impairment |
| 3 | Profound impairment, both eyes                                             | Severe Vision Impairment |
| 3 | Moderate or severe impairment, better eye- lesser eye: profound impairment | Severe Vision Impairment |
| 3 | Moderate or severe impairment, better eye- lesser eye: profound impairment | Severe Vision Impairment |
| 3 | Better eye: severe impairment; lesser eye: blind, not further specified    | Severe Vision Impairment |
| 3 | Severe impairment, better eye- lesser eye: total impairment                | Severe Vision Impairment |
| 3 | Severe impairment, better eye- lesser eye: near-total impairment           | Severe Vision Impairment |
| 3 | Severe impairment, better eye- lesser eye: profound impairment             | Severe Vision Impairment |
| 3 | Better eye: moderate impairment; lesser eye: blind, not further specified  | Severe Vision Impairment |
| 3 | Better eye: moderate impairment; lesser eye: total impairment              | Severe Vision Impairment |
| 3 | Better eye: moderate impairment; lesser eye: near-total impairment         | Severe Vision Impairment |
| 3 | Better eye: moderate impairment; lesser eye: profound impairment           | Severe Vision Impairment |
| 3 | Severe impairment, better eye- lesser eye: severe impairment               | Severe Vision Impairment |
| 3 | Legal blindness as defined in the U.S.A                                    | Severe Vision Impairment |
| 4 | Decubitus Ulcer                                                            | Decubitus Ulcer          |
| 4 | Pressure Ulcer, Unspecified Site                                           | Decubitus Ulcer          |
| 4 | Pressure Ulcer, Elbow                                                      | Decubitus Ulcer          |
| 4 | Pressure Ulcer, Upper Back                                                 | Decubitus Ulcer          |
| 4 | Pressure Ulcer, Lower Back                                                 | Decubitus Ulcer          |
| 4 | Pressure Ulcer, Hip                                                        | Decubitus Ulcer          |

|   |                                         |                                              |
|---|-----------------------------------------|----------------------------------------------|
| 4 | Pressure Ulcer, Buttock                 | Decubitus Ulcer                              |
| 4 | Pressure Ulcer, Ankle                   | Decubitus Ulcer                              |
| 4 | Pressure Ulcer, Heel                    | Decubitus Ulcer                              |
| 4 | Pressure Ulcer, Other Site              | Decubitus Ulcer                              |
| 4 | Pressure Ulcer, Unspecified Stage       | Decubitus Ulcer                              |
| 4 | Pressure Ulcer, Stage 1                 | Decubitus Ulcer                              |
| 4 | Pressure Ulcer, Stage 2                 | Decubitus Ulcer                              |
| 4 | Pressure Ulcer, Stage 3                 | Decubitus Ulcer                              |
| 4 | Pressure Ulcer, Stage 4                 | Decubitus Ulcer                              |
| 4 | Pressure Ulcer, Unstageable             | Decubitus Ulcer                              |
| 9 | Abnormality of gait                     | Difficulty in walking                        |
| 5 | Atony of bladder                        | Major Problems of Urine Retention or Control |
| 5 | Paralysis of bladder                    | Major Problems of Urine Retention or Control |
| 5 | Detrusor sphincter dyssynergia          | Major Problems of Urine Retention or Control |
| 9 | Lack of coordination                    | Difficulty in walking                        |
| 5 | Incontinence without sensory awareness  | Major Problems of Urine Retention or Control |
| 5 | Continuous leakage                      | Major Problems of Urine Retention or Control |
| 6 | Anorexia                                | Loss of Weight                               |
| 6 | Abnormal loss of weight and underweight | Loss of Weight                               |
| 6 | Loss of weight                          | Loss of Weight                               |
| 6 | Underweight                             | Loss of Weight                               |
| 6 | Feeding difficulties and mismanagement  | Loss of Weight                               |
| 6 | Adult failure to thrive                 | Loss of Weight                               |
| 7 | Full incontinence of feces              | Absence of Fecal Control                     |
| 8 | Lack Of Housing                         | Social Support Needs                         |
| 8 | Inadequate Housing                      | Social Support Needs                         |
| 8 | Inadequate material resources           | Social Support Needs                         |

|    |                                                                                                        |                       |
|----|--------------------------------------------------------------------------------------------------------|-----------------------|
| 8  | No other household member able to render care                                                          | Social Support Needs  |
| 8  | Holiday relief care                                                                                    | Social Support Needs  |
| 8  | Unspecified housing or economic circumstance                                                           | Social Support Needs  |
| 8  | No Med Facility For Care                                                                               | Social Support Needs  |
| 8  | Home Remote From Hospitl                                                                               | Social Support Needs  |
| 8  | No Medical Serv In Home                                                                                | Social Support Needs  |
| 8  | Wait Adm To Oth Facility                                                                               | Social Support Needs  |
| 8  | No Med Facilities Nec                                                                                  | Social Support Needs  |
| 8  | No Med Facilities Nos                                                                                  | Social Support Needs  |
| 8  | Activities Involving Person Providing Caregiving                                                       | Social Support Needs  |
| 8  | Activities Involving Person Providing Caregiving, Caregiving Involving Bathing                         | Social Support Needs  |
| 8  | Activities Involving Person Providing Caregiving, Caregiving Involving Lifting                         | Social Support Needs  |
| 8  | Activities Involving Person Providing Caregiving, Other Activity Involving Person Providing Caregiving | Social Support Needs  |
| 9  | Other Dependence on Machines and Devices, Wheelchair Dependence                                        | Difficulty in walking |
| 10 | Fall From Chair                                                                                        | Fall                  |
| 10 | Fall From Wheelchair                                                                                   | Fall                  |
| 10 | Fall From Bed                                                                                          | Fall                  |
| 10 | Fall From Furniture Nec                                                                                | Fall                  |
| 10 | Fall From Commode                                                                                      | Fall                  |
| 10 | History of Fall; Increased susceptibility to falling that may cause physical harm                      | Fall                  |

The materials provided in this appendix are copyrighted by The Johns Hopkins University.
